# Supplementary material for: Fabrication of ultrathin conductive protein-based fibrous films and their thermal sensing properties
Source: Royal Society of Chemistry journal article supplement (doi:10.1039/c5ta09645f), 2016-01-01
Supplement: c5ta09645f1.pdf [file c5ta09645f1.pdf]

## Fabrication of Ultrathin Conductive Protein-Based Fibrous Films and Their Thermal Sensing Property

*Xingwei Shi<sup>a</sup>, Er-Xia Chen<sup>c</sup>, Jian Zhang<sup>c</sup>, Hongbo Zeng<sup>b</sup>, Lingyun Chen<sup>a\*</sup>*

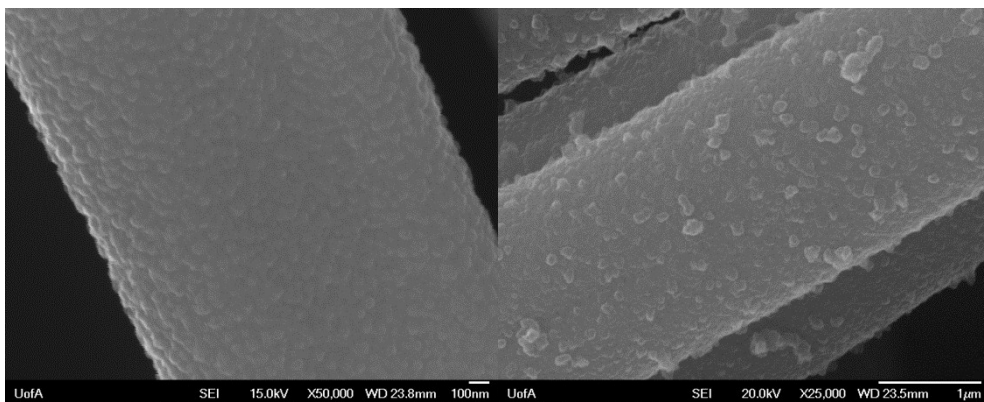

**Fig. S1** SEM images of HP fibrous films with a long reaction time (left) and at a high reaction temperature (right).

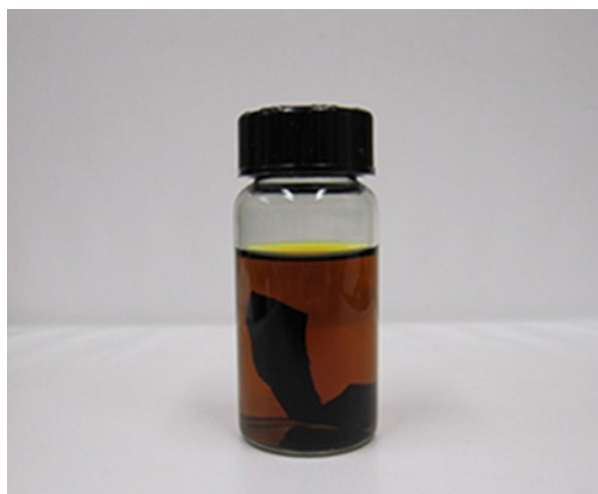

**Fig. S2** Photograph of HP film after the polymerization of pyrrole in ethanol solution at low temperature.

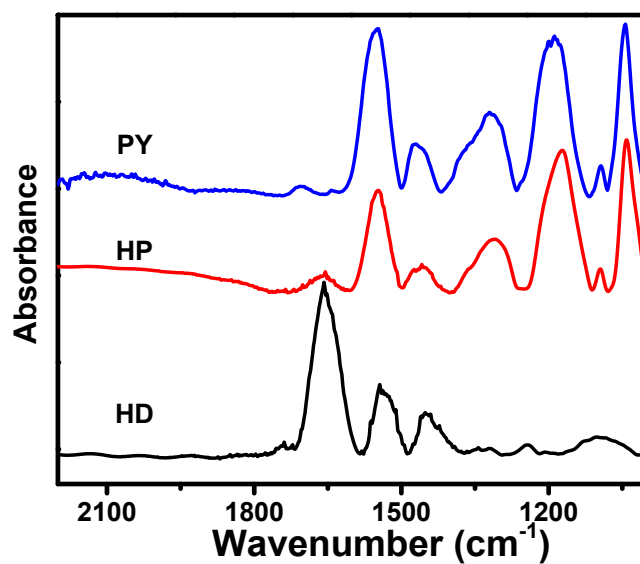

**Fig. S3** FT-IR spectra of hordein fibrous films (HD), HP fibrous films (HP), and polypyrrole powder (PY).

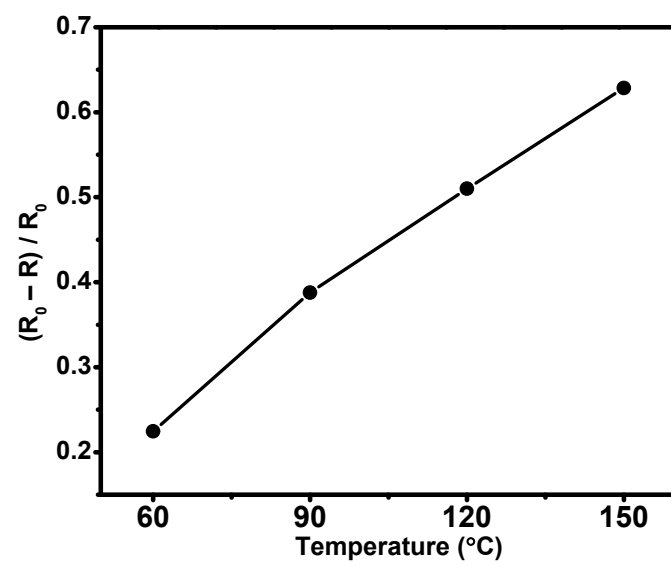

**Fig. S4** Sensibility (S) values of HP fibrous films at different temperatures .
